# Supplementary material for: Vaccination with Schistosoma mansoni Cholinesterases Reduces the Parasite Burden and Egg Viability in a Mouse Model of Schistosomiasis
Source: PubMed Central journal article supplement (PMC7349746; doi:10.3390/vaccines8020162), 2020-04-03
Supplement: vaccines-08-00162-s001.pdf [file vaccines-08-00162-s001.pdf]

Supporting information

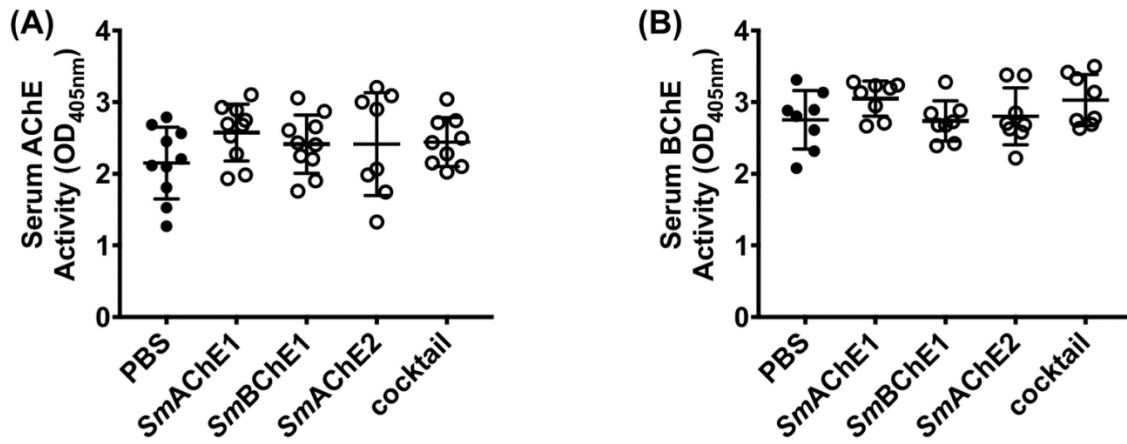

Figure S1. ChE activity in the serum of control and vaccinated mice (trial 2). Activity was measured by Ellman assay. (A) AChE. (B) BChE. Data are the average of triplicate technical experiments  $\pm$  SEM.

Table S1. Anti-*SmChE* IgG titers and worm burdens of vaccinated groups from trial 1.

| Immunogen                | Mouse                         | Total IgG endpoint titres |          | Worm burden |
|--------------------------|-------------------------------|---------------------------|----------|-------------|
|                          |                               | Pre-challenge             | Necropsy |             |
| <i>SmAChE1</i><br>n = 10 | 1                             | 1,974,491                 | 229,723  | 29          |
|                          | 2                             | 682,718                   | 134,438  | 39          |
|                          | 3                             | 866,872                   | 186,065  | 30          |
|                          | 4                             | 1,260,333                 | 163,544  | 36          |
|                          | 5                             | 2,129,001                 | 171,513  | 34          |
|                          | 6                             | 1,173,196                 | 299,021  | 21          |
|                          | 7                             | 2,096,392                 | 113,649  | 17          |
|                          | 8                             | 1,597,200                 | 188,144  | 40          |
|                          | 9                             | 1,692,421                 | 210,666  | 19          |
|                          | 10                            | 1,638,522                 | 153,495  | 35          |
| <i>SmBChE1</i><br>n = 10 | 1                             | 516,530                   | 106,352  | 30          |
|                          | 2                             | 1,430,114                 | 105,517  | 42          |
|                          | 3                             | 540,784                   | 120,551  | 19          |
|                          | 4                             | 985,449                   | 79,625   | 18          |
|                          | 5                             | 1,617,861                 | 75,449   | 29          |
|                          | 6                             | 955,805                   | 74,614   | 28          |
|                          | 7                             | 1,609,776                 | 28,676   | 39          |
|                          | 8                             | 1,223,502                 | 83,244   | 21          |
|                          | 9                             | 1,275,604                 | 59,579   | 20          |
|                          | 10                            | 1,257,638                 | 117,210  | 21          |
| <i>SmAChE2</i><br>n = 9  | 1                             | 485,262                   | 120,273  | 37          |
|                          | 2                             | 488,682                   | 178,182  | 40          |
|                          | 3                             | 495,869                   | 77,676   | 34          |
|                          | 4                             | 510,242                   | 94,102   | 37          |
|                          | 5                             | 495,869                   | 143,659  | 30          |
|                          | 7                             | 492,275                   | 49,835   | 20          |
|                          | 8                             | 560,547                   | 197,392  | 23          |
|                          | 9                             | 538,988                   | 163,426  | 15          |
|                          | 10                            | 510,242                   | 96,886   | 20          |
|                          | <i>SmChE</i> cocktail<br>n=10 | 1                         | 919,872  | 154,517     |
| 2                        |                               | 1,616,963                 | 173,170  | 29          |
| 3                        |                               | 1,185,773                 | 165,096  | 28          |
| 4                        |                               | 2,378,732                 | 309,590  | 34          |

|  |    |           |         |    |
|--|----|-----------|---------|----|
|  | 5  | 1,381,605 | 172,335 | 37 |
|  | 6  | 1,622,353 | 448,795 | 17 |
|  | 7  | 1,192,959 | 97,165  | 21 |
|  | 8  | 1,500,182 | 199,341 | 23 |
|  | 9  | 3,171,044 | 449,630 | 19 |
|  | 10 | 2,112,832 | 351,073 | 21 |

**Table S2.** Anti-*SmChE* IgG titers and worm burdens of vaccinated groups from trial 2.

| Immunogen                         | Mouse | Total IgG endpoint titres |           | Worm burden |
|-----------------------------------|-------|---------------------------|-----------|-------------|
|                                   |       | Pre-challenge             | Necropsy  |             |
| <i>SmAChE1</i><br>n = 10          | 1     | 547,971                   | 168,394   | 32          |
|                                   | 2     | 2,355,376                 | 86,969    | 21          |
|                                   | 3     | 923,466                   | 124,390   | 20          |
|                                   | 4     | 1,131,874                 | 110,877   | 18          |
|                                   | 5     | 2,966,229                 | 128,548   | 30          |
|                                   | 6     | 1,166,010                 | 199,579   | 20          |
|                                   | 7     | 1,947,542                 | 135,824   | 21          |
|                                   | 8     | 2,089,475                 | 118,153   | 22          |
|                                   | 9     | 1,764,286                 | 145,180   | 19          |
|                                   | 10    | 2,711,108                 | 114,342   | 20          |
| <i>SmBChE1</i><br>n = 10          | 1     | 284,276                   | 71,273    | 9           |
|                                   | 2     | 449,954                   | 141,988   | 20          |
|                                   | 3     | 396,539                   | 176,790   | 19          |
|                                   | 4     | 522,381                   | 124,170   | 28          |
|                                   | 5     | 536,866                   | 102,176   | 19          |
|                                   | 6     | 1,879,484                 | 89,648    | 18          |
|                                   | 7     | 451,764                   | 36,750    | 22          |
|                                   | 8     | 899,002                   | 108,579   | 30          |
|                                   | 9     | 716,123                   | 125,005   | 18          |
|                                   | 10    | 588,470                   | 156,466   | 20          |
| <i>SmAChE2</i><br>n = 8           | 1     | 1,130,077                 | 430,420   | 17          |
|                                   | 2     | 2,076,899                 | 190,432   | 10          |
|                                   | 3     | 1,404,961                 | 338,545   | 32          |
|                                   | 5     | 1,609,776                 | 319,056   | 26          |
|                                   | 7     | 1,814,592                 | 249,733   | 19          |
|                                   | 8     | 2,427,241                 | 270,056   | 25          |
|                                   | 9     | 1,805,609                 | 288,153   | 16          |
|                                   | 10    | 2,136,188                 | 248,062   | 15          |
| <i>SmChE</i><br>cocktail<br>n = 9 | 1     | 2,567,378                 | 364,715   | 28          |
|                                   | 2     | 1,951,135                 | 387,173   | 20          |
|                                   | 3     | 1,352,859                 | 361,122   | 15          |
|                                   | 4     | 1,891,847                 | 720,447   | 14          |
|                                   | 5     | 1,245,061                 | 363,817   | 16          |
|                                   | 6     | 2,005,034                 | 1,370,825 | 21          |
|                                   | 7     | 1,478,623                 | 293,748   | 19          |
|                                   | 9     | 3,066,840                 | 1,105,823 | 11          |
|                                   | 10    | 1,999,644                 | 893,821   | 24          |
